# Supplementary material for: Acacia auriculiformis–Derived Bimodal Porous Nanocarbons via Self-Activation for High-Performance Supercapacitors
Source: Frontiers journal article supplement (doi:10.3389/fenrg.2021.744133), 2021-09-23
Supplement: Data_Sheet_1.pdf [file Data_Sheet_1.pdf]

# ***Acacia auriculiformis* Derived Bimodal Porous Nanocarbons via Self-activation for High Performance Supercapacitors**

## **Supplementary Information**

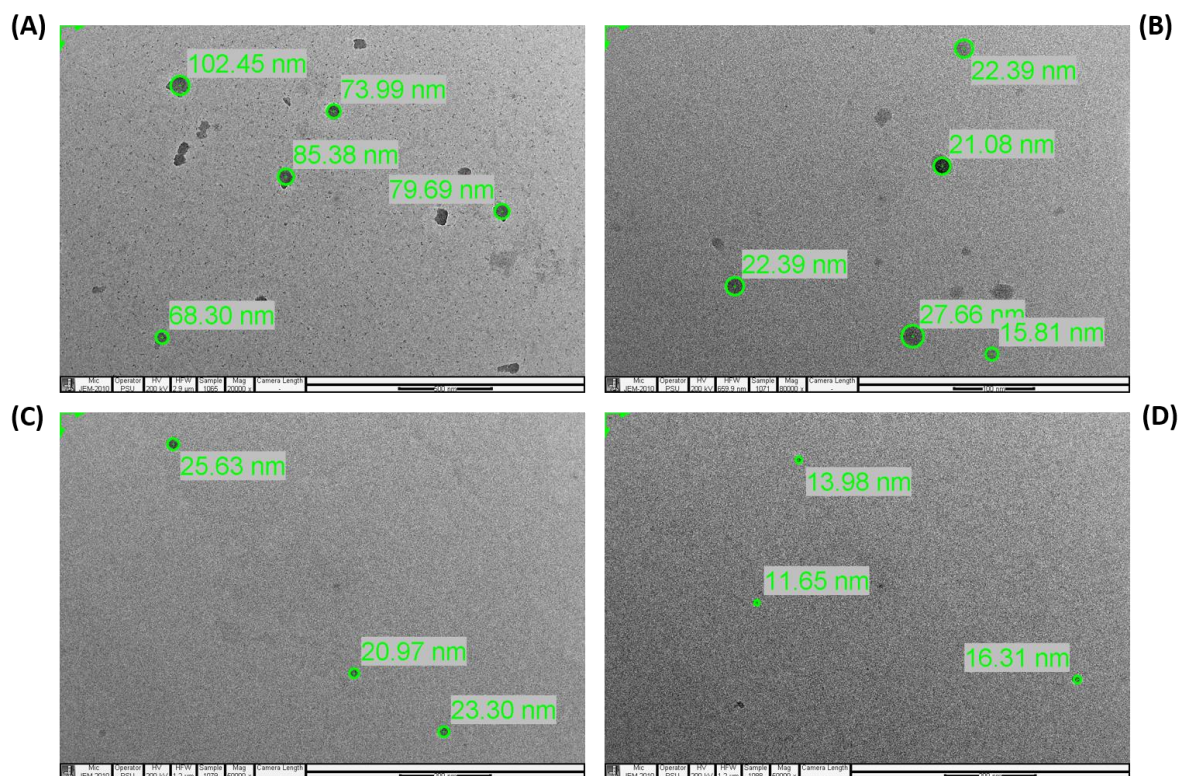

**Figure S1.** TEM images and measurement of particle sizes of AAC400 (A), AAC600 (B), AAC800 (C) and AAC1000 (D).

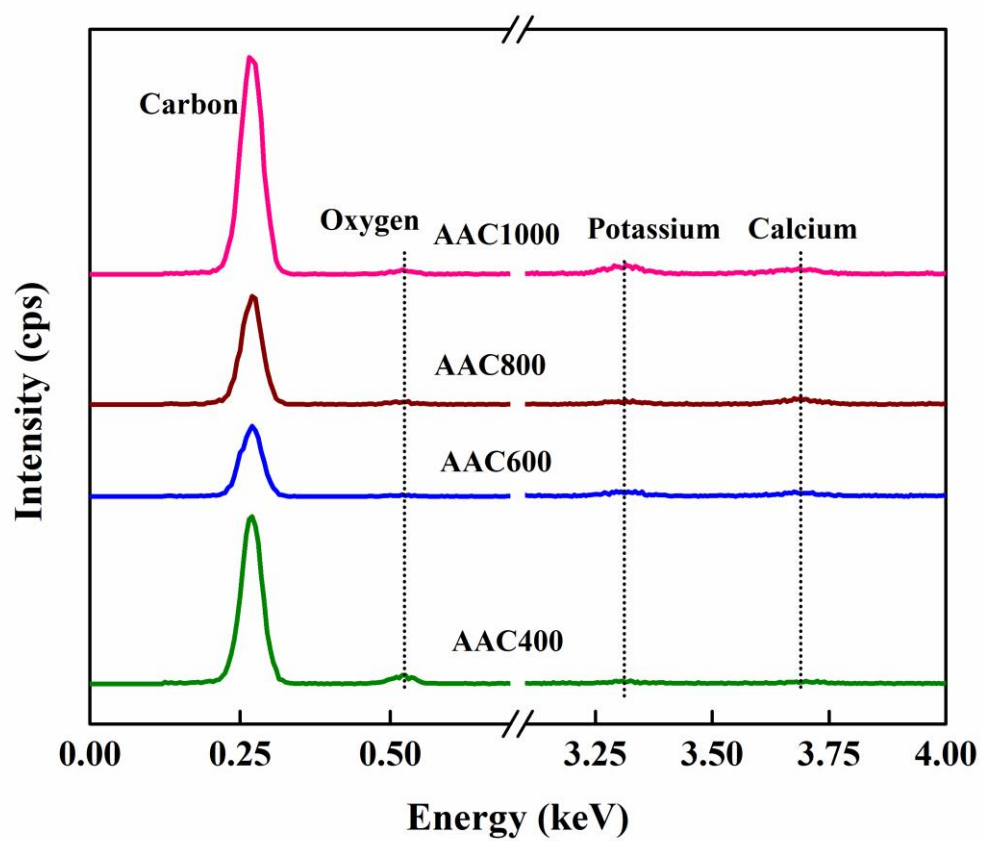

**Figure S2.** Elemental compositions of AACs obtained from SEM coupled with EDS

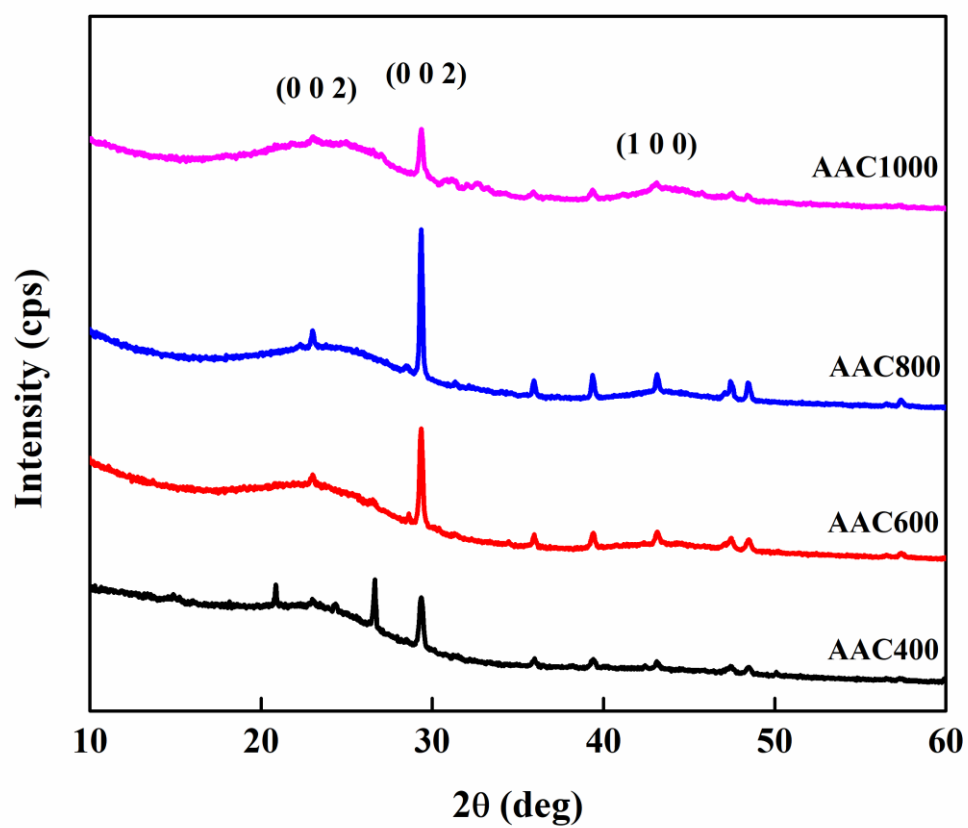

**Figure S3.** XRD patterns of AACs

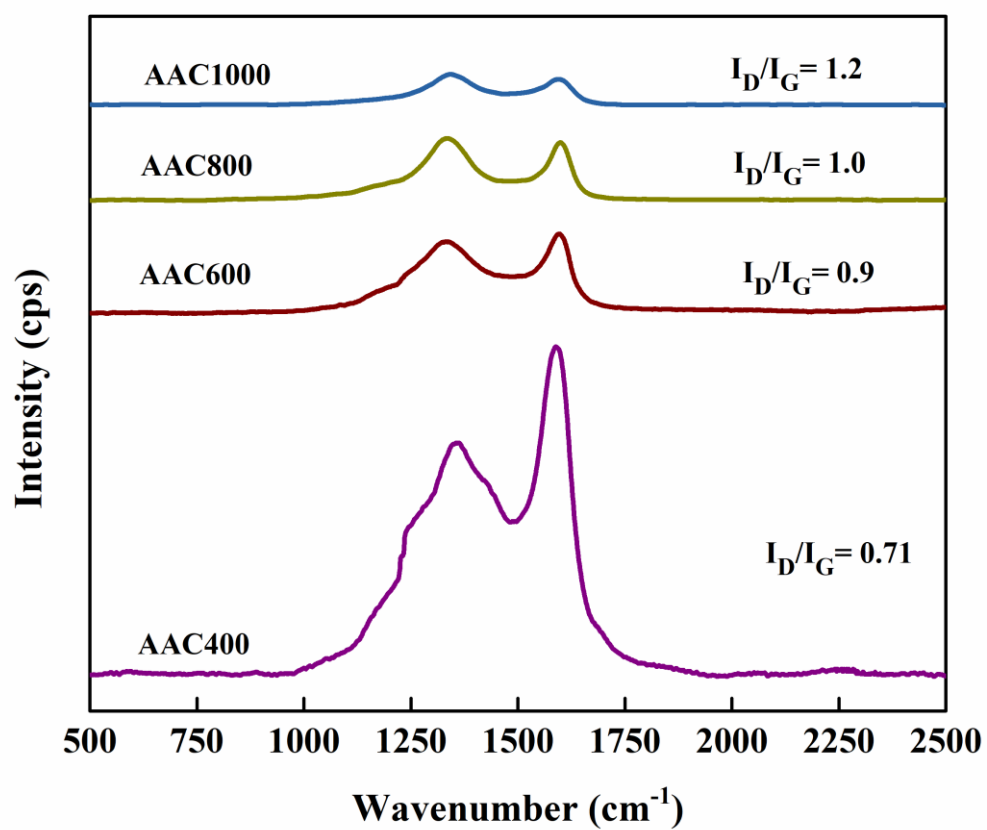

**Figure S4.** Raman spectra of AACs with  $I_D/I_G$  value calculated for respective AACs.

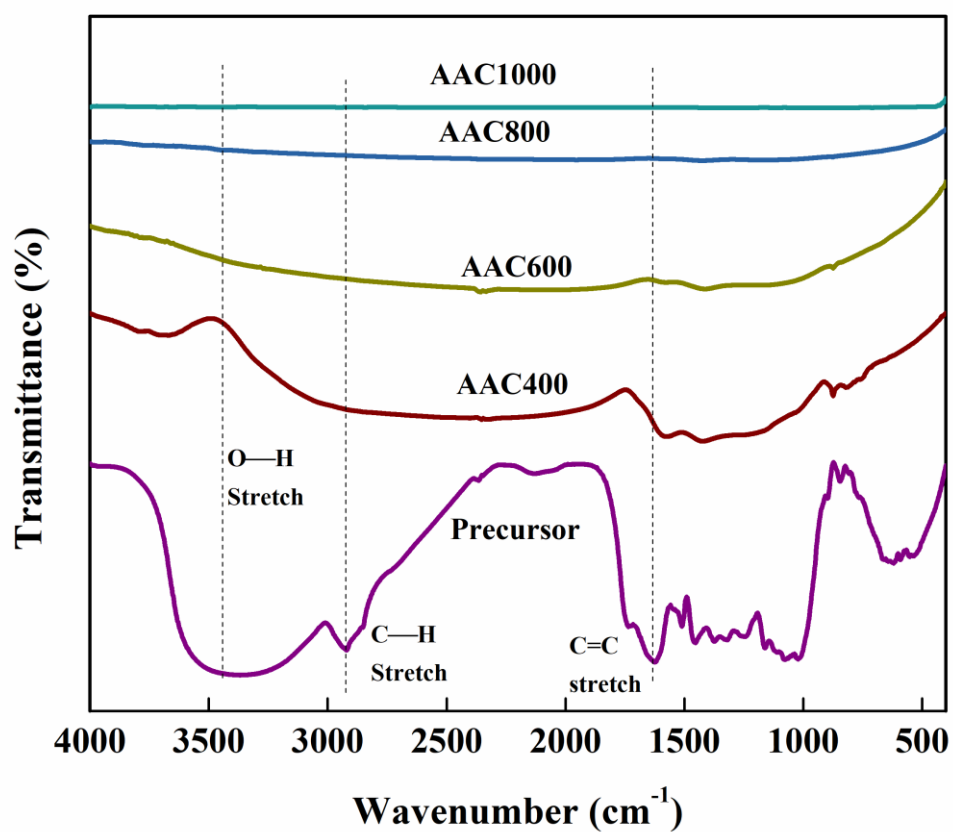

**Figure S5.** FTIR spectra of carbon precursor and all the synthesized AACs.

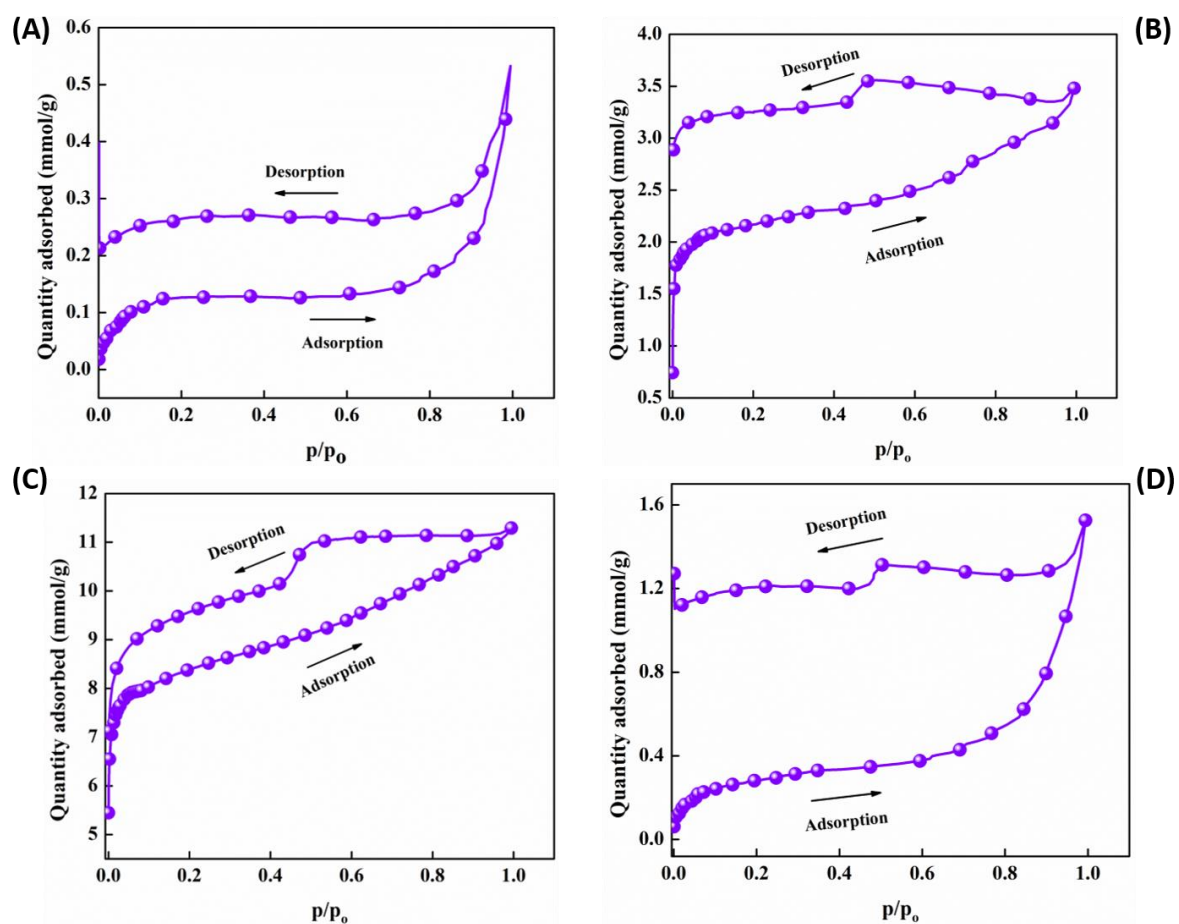

**Figure S6.**  $N_2$  adsorption-desorption isotherms for AAC400 (A), AAC600 (B), AAC800 (C) and AAC1000 (D).

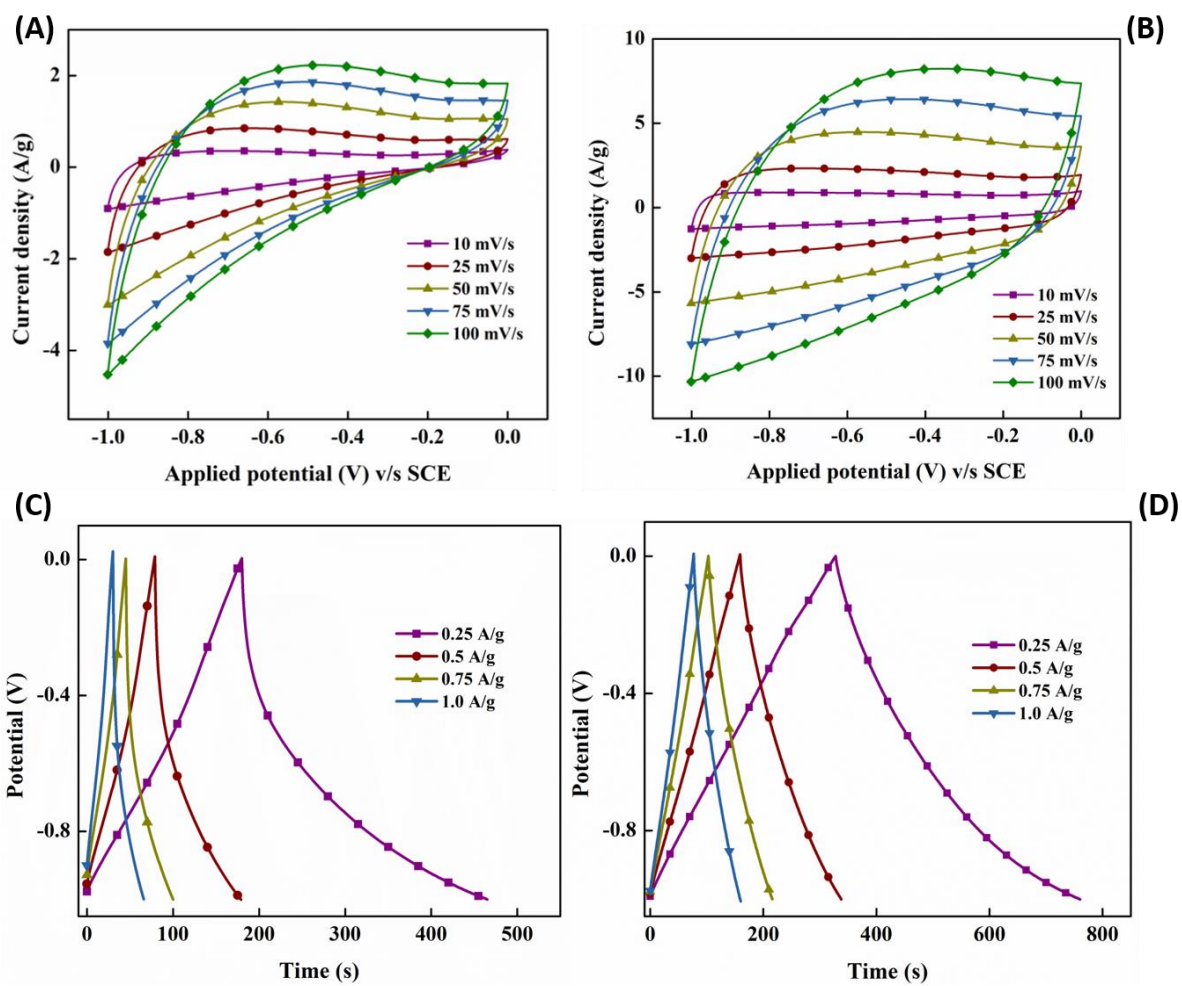

**Figure S7.** CV and GCD plot of AAC600 (A & C) and AAC1000 (B & D)



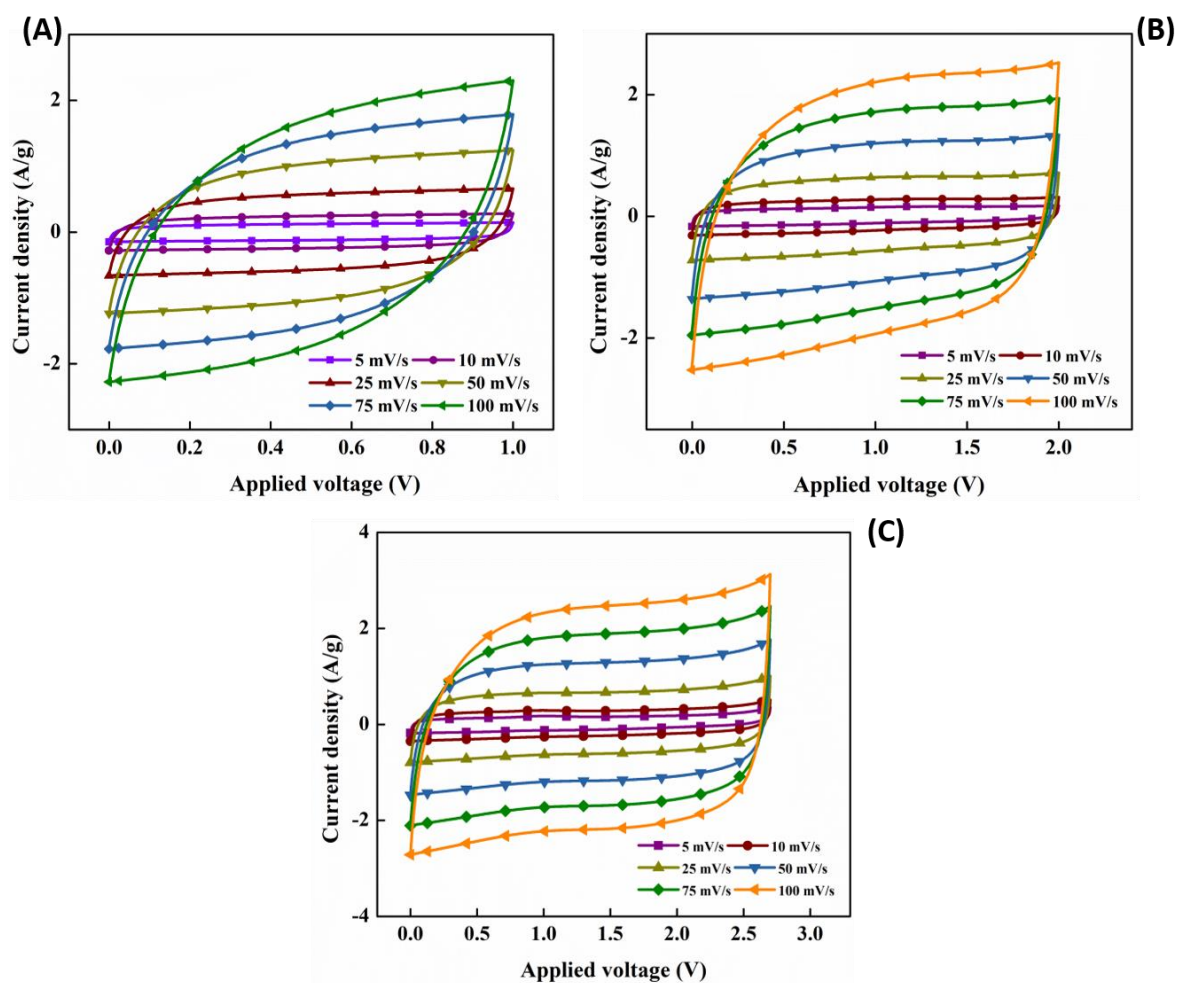

**Figure S8.** CV of OSSc operated at 1.0 V (A), 2.0 V (B) and 2.7 V (C) at different scan rates (5-100 mV/s).

**Table S1.** Energy parameters of OSSc at 2.3 V

| Current density (A/g) | Specific capacitance (F/g) | Energy density (Wh/kg) | Power density (W/kg) |
|-----------------------|----------------------------|------------------------|----------------------|
| 0.1                   | 52.3                       | 16.7                   | 98.0                 |
| 0.25                  | 48.3                       | 15.4                   | 252.5                |
| 0.5                   | 45.1                       | 14.4                   | 513.5                |
| 0.75                  | 44                         | 14.1                   | 778.5                |
| 1                     | 43.2                       | 13.8                   | 1057.0               |
| 2.5                   | 38                         | 12.1                   | 2300                 |
| 5                     | 37.6                       | 12.0                   | 2882.7               |
